# Supplementary material for: Gliadin Induces Neutrophil Migration via Engagement of the Formyl Peptide Receptor, FPR1
Source: PubMed Central journal article supplement (PMC4574934; doi:10.1371/journal.pone.0138338), 2015-09-17
Supplement: pone.0138338.s007.pdf [file pone.0138338.s007.pdf]

MVRVPVPLQPNPSQQHPQ  
PQNPSQQHPQEQVPLVQQQQ  
EQVPLVQQQFLGQQQSFPF  
FLGQQQSFPFQQPYQPQPF

QPYPQPQPFPSQQPYLQLQ  
PSQQPYLQLQPFQPQLPYL  
PFPQPQLPYLQPQFRPQQP  
QPQFRPQQPYQPQPQYSQ

YPQPQPQYSQPQQPISQQQQ  
PQQPISQQQQQQQQQQQQQQ  
QQQQQQQQQQQQQQQQQQQQ  
QQQQQQQQQQQILQQILQQ

QQILQQILQQQLIPCMDVVL  
QLIPCMDVVLQQHNIAGRS  
QQHNIAGRSQVLQQSTYQL  
QVLQQSTYQLLQELCCQHLW

LQELCCQHLWQIPEQSQCQA  
QIPEQSQCQAIHNVVHAIL  
IHNVVHAILHQQKQQQQP  
HQQKQQQQPSSQVSFQQPL

SSQVSFQQPLQQYPLGQGSF  
QQYPLGQGSFRPSQQNPLAQ  
RPSQQNPLAQGSVQPQLPQ  
GSVQPQLPQFEEIRNLALQ

FEEIRNLALQTLPAMCNVYI  
TLPAMCNVYIPPYCTIVPFG  
PPYCTIVPFGIFGTNYR
